# Supplementary material for: Consequence of products from oxidative coupling of methane in a non-oxidative high temperature environment
Source: Royal Society of Chemistry journal article supplement (doi:10.1039/d2cy02145e), 2023-01-01
Supplement: d2cy02145e1.pdf [file d2cy02145e1.pdf]

## **Supporting Information**

# Consequence of products from oxidative coupling of methane in non-oxidative high temperature environment

*Haruka Komada,<sup>a</sup> Keisuke Obata,<sup>a</sup> Duanxing Li,<sup>a</sup> S. Mani Sarathy,<sup>b,c</sup> and Kazuhiro Takanabe<sup>\*,a,d</sup>*

<sup>a</sup> Department of Chemical System Engineering, School of Engineering, The University of Tokyo, 7-3-1 Hongo, Bunkyo-ku, Tokyo, Japan

<sup>b</sup> Clean Combustion Research Center (CCRC), Physical Sciences and Engineering Division, King Abdullah University of Science and Technology (KAUST), Thuwal, 23955-6900, Saudi Arabia.

<sup>c</sup> KAUST Catalysis Center (KCC), Physical Sciences and Engineering Division, King Abdullah University of Science and Technology (KAUST), Thuwal, 23955-6900, Saudi Arabia.

<sup>b</sup> PRESTO, Japan Science and Technology Agency (JST), Kawaguchi, Saitama, Japan

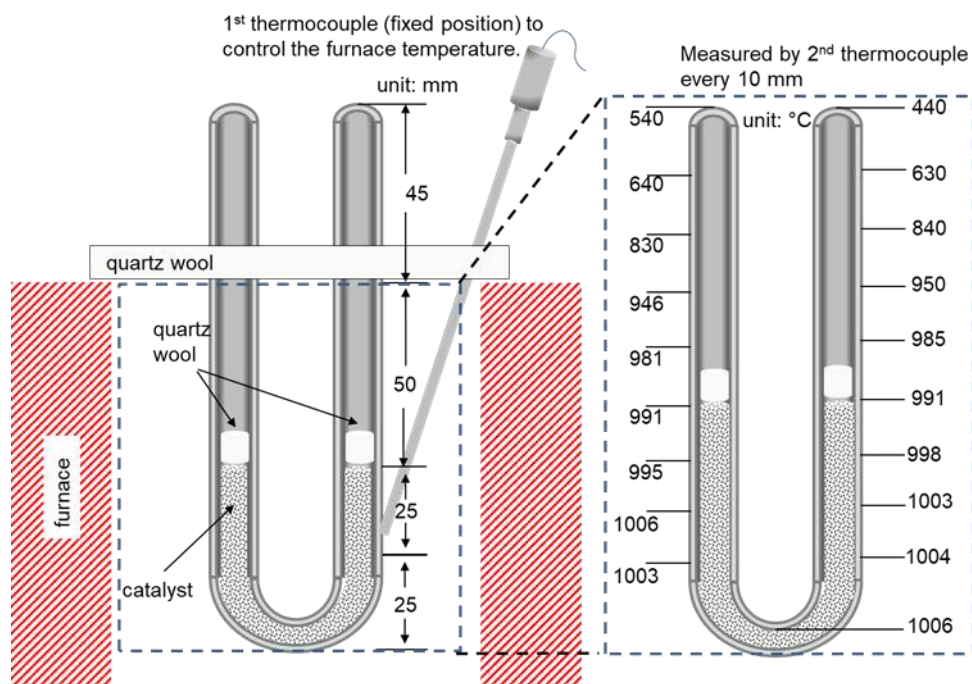

**Figure S1.** Temperature distribution along the U-shaped quartz reactor measured by 2<sup>nd</sup> thermocouple while the furnace temperature was maintained at 1000 °C. The catalyst bed was filled with 760 mg of 5 wt% Na<sub>2</sub>WO<sub>4</sub>/SiO<sub>2</sub>. Inlet gas: CH<sub>4</sub> 10 kPa, O<sub>2</sub> 1.7 kPa, H<sub>2</sub>O 1.7 kPa, total pressure 101 kPa, Ar balance, 80 mL min<sup>-1</sup>.

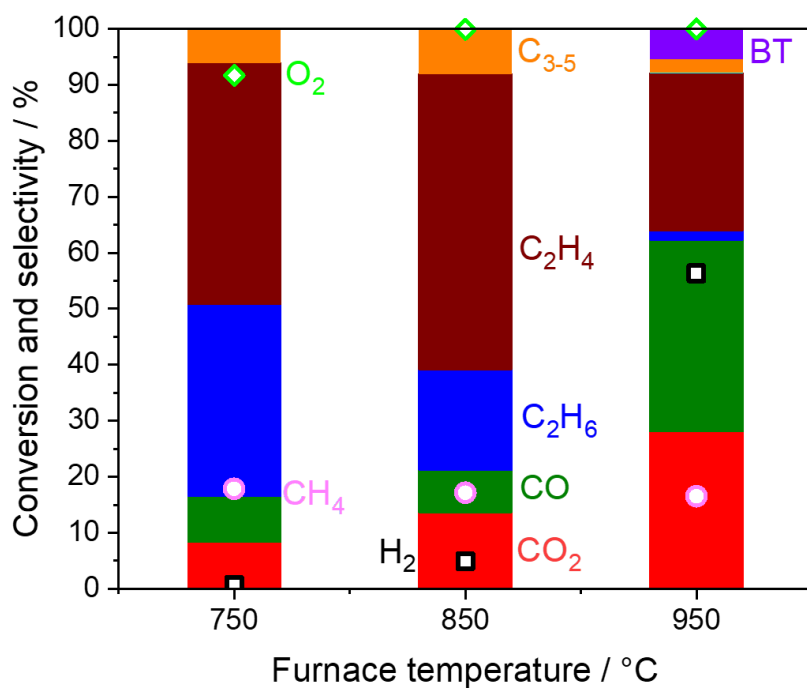

**Figure S2.** Product distribution and conversions of CH<sub>4</sub> and O<sub>2</sub> from the outlets the first reactor filled with 800 mg of 5 wt% Na<sub>2</sub>WO<sub>4</sub>/SiO<sub>2</sub> at 750, 850, and 950 °C. Inlet gas; CH<sub>4</sub> 10 kPa, O<sub>2</sub> 1.4 kPa, H<sub>2</sub>O 1.7 kPa, total pressure 101 kPa, Ar balance, 40 mL min<sup>-1</sup>.

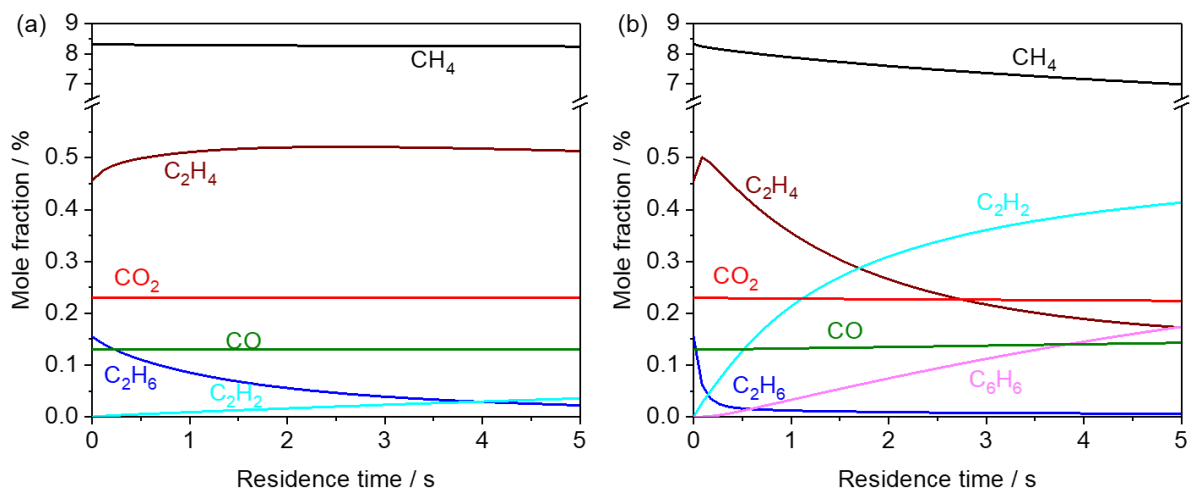

**Figure S3.** Simulated mole fractions at (a) 850 and (b) 1000 °C using KAM1-GS gas phase kinetics feeding the gas composition experimentally obtained from the outlet of first reactor.

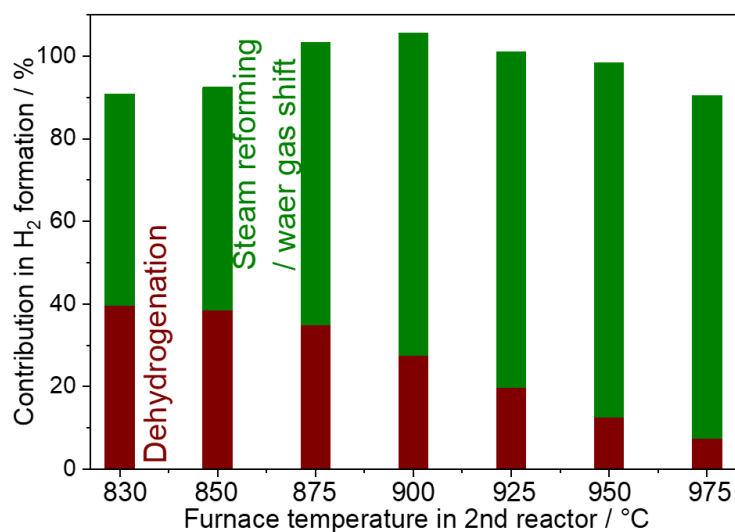

**Figure S4.** Contributions in H<sub>2</sub> formation estimated from C<sub>2</sub>H<sub>6</sub> consumption and CO<sub>x</sub> formation in the second reactor filled with 800 mg of catalysts (5 wt% Na<sub>2</sub>WO<sub>4</sub>/SiO<sub>2</sub>) at 830 - 975 °C. The first reactor; 800 mg of 5 wt% Na<sub>2</sub>WO<sub>4</sub>/SiO<sub>2</sub> at 850 °C. Inlet gas; CH<sub>4</sub> 10 kPa, O<sub>2</sub> 1.4 kPa, H<sub>2</sub>O 1.7 kPa, total pressure 101 kPa, Ar balance, 40 mL min<sup>-1</sup>. O<sub>2</sub> is depleted in all the conditions. Corresponding data is shown in Fig. 6b.

**Supplementary note 1:** Contribution in H<sub>2</sub> formation in the second reactor filled with catalysts

In the second reactor filled with 800 mg of catalysts (5 wt% Na<sub>2</sub>WO<sub>4</sub>/SiO<sub>2</sub>), we have compared 1) total H<sub>2</sub> formed, 2) estimated H<sub>2</sub> formed by dehydrogenation of C<sub>2</sub>H<sub>6</sub> to C<sub>2</sub>H<sub>4</sub>, and 3) estimated H<sub>2</sub> formed by steam reforming / water gas shift reactions to CO<sub>x</sub>.

1) Total H<sub>2</sub> formed, ΔH<sub>2</sub>

ΔH<sub>2</sub> was obtained from the H<sub>2</sub> concentration measured at the outlet of first and second reactor.

$$\Delta H_2 = H_2(2nd\ outlet) - H_2(1st\ outlet)$$

2) Estimated H<sub>2</sub> formed by dehydrogenation of C<sub>2</sub>H<sub>6</sub> to C<sub>2</sub>H<sub>4</sub>, ΔH<sub>2</sub>(C<sub>2</sub>H<sub>6</sub> consumption)

We assume the consumption of C<sub>2</sub>H<sub>6</sub> in the second reactor fully comes from the following equation.

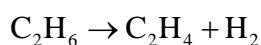

ΔH<sub>2</sub>(C<sub>2</sub>H<sub>6</sub> consumption) was estimated from the measured C<sub>2</sub>H<sub>6</sub> concentration at the outlet of first and second reactor.

$$\Delta H_2(C_2H_6\ consumption) = C_2H_6(1st\ outlet) - C_2H_6(2nd\ outlet)$$

3) Estimated H<sub>2</sub> formed by steam reforming and water gas shift reactions to CO<sub>x</sub>, ΔH<sub>2</sub>(CO<sub>x</sub> formation)

We assume the formation of CO<sub>x</sub> in the second reactor fully comes from the reaction with H<sub>2</sub>O in the following equations according to oxygen balance.

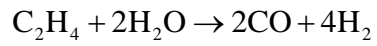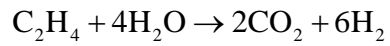

$\Delta\text{H}_2(\text{CO}_x \text{ formation})$  was estimated from the measured  $\text{CO}_x$  concentration at the outlet of first and second reactor.

$$\Delta\text{H}_2(\text{CO}_x \text{ formation}) = 2 \times (\text{CO}(2\text{nd outlet}) - \text{CO}(1\text{st outlet})) + 3 \times (\text{CO}_2(2\text{nd outlet}) - \text{CO}_2(1\text{st outlet}))$$

Their contributions are compared following the equations below and shown in Fig. S4.

$$\text{H}_2(\text{Dehydrogenation}) = \Delta\text{H}_2(\text{C}_2\text{H}_6 \text{ consumption}) / \Delta\text{H}_2 \times 100$$

$$\text{H}_2(\text{Steam reforming / water gas shift}) = \Delta\text{H}_2(\text{CO}_x \text{ formation}) / \Delta\text{H}_2 \times 100$$

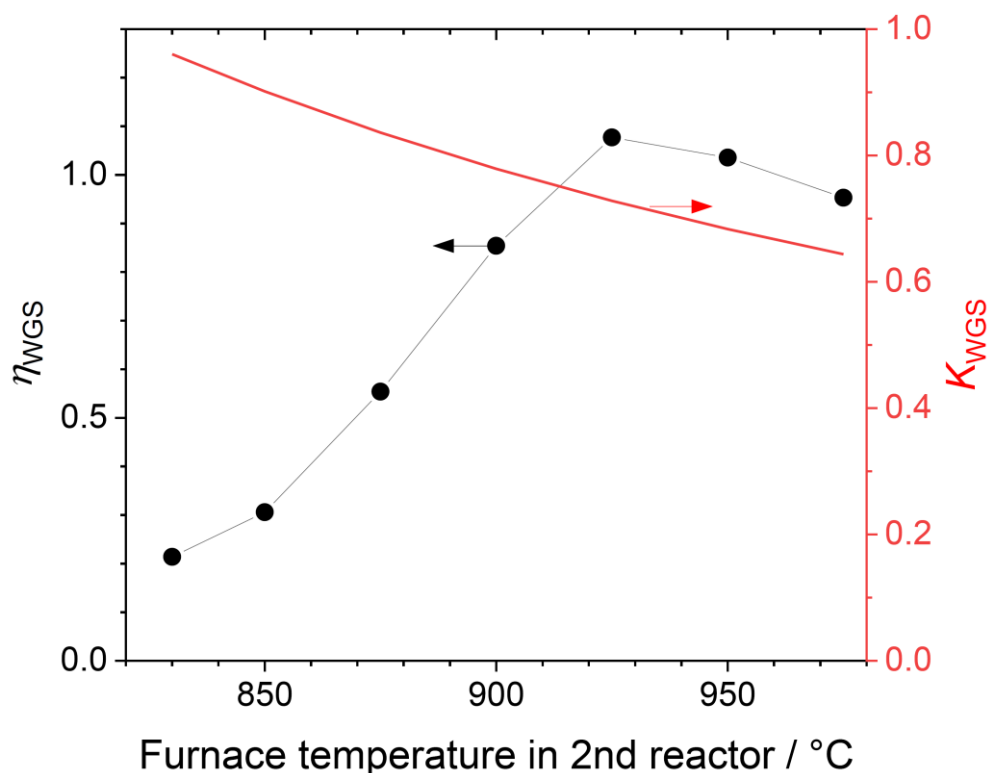

**Figure S5.** The equilibrium constant of water gas shift reaction,  $K_{\text{WGS}}$ ,<sup>1</sup> and  $\eta_{\text{WGS}}$  ( $\eta_{\text{WGS}} = P_{\text{CO}_2} P_{\text{H}_2} / P_{\text{CO}} P_{\text{H}_2\text{O}} K_{\text{WGS}}$ ) estimated from the partial pressures in the outlet from the second reactor filled with 800 mg of catalysts (5 wt%  $\text{Na}_2\text{WO}_4/\text{SiO}_2$ ) at 830 - 975 °C. The first reactor was filled with 800 mg of 5 wt%  $\text{Na}_2\text{WO}_4/\text{SiO}_2$  at 850 °C. The partial pressure of  $\text{H}_2\text{O}$  was estimated from the oxygen balance using the concentrations of the introduced  $\text{O}_2$  and  $\text{H}_2\text{O}$  in the inlet and the measured  $\text{CO}$  and  $\text{CO}_2$  in the outlet. Inlet gas;  $\text{CH}_4$  10 kPa,  $\text{O}_2$  1.4 kPa,  $\text{H}_2\text{O}$  1.7 kPa, total pressure 101 kPa, Ar balance, 40 mL  $\text{min}^{-1}$ .

### Reference

1 CA. Callaghan, *Kinetics and catalysis of the water-gas shift reaction: a microkinetic and graph theoretic approach*. PhD Thesis, Department of Chemical Engineering, Worcester Polytechnic Institute, Worcester, MA, 2006
